# Supplementary material for: In-Silico Prediction and Modeling of the Quorum Sensing LuxS Protein and Inhibition of AI-2 Biosynthesis in Aeromonas hydrophila
Source: MDPI journal article supplement (doi:10.3390/molecules23102627), 2018-10-12
Supplement: s1 [file s1]

# RAMPAGE: Assessment of the Ramachandran Plot

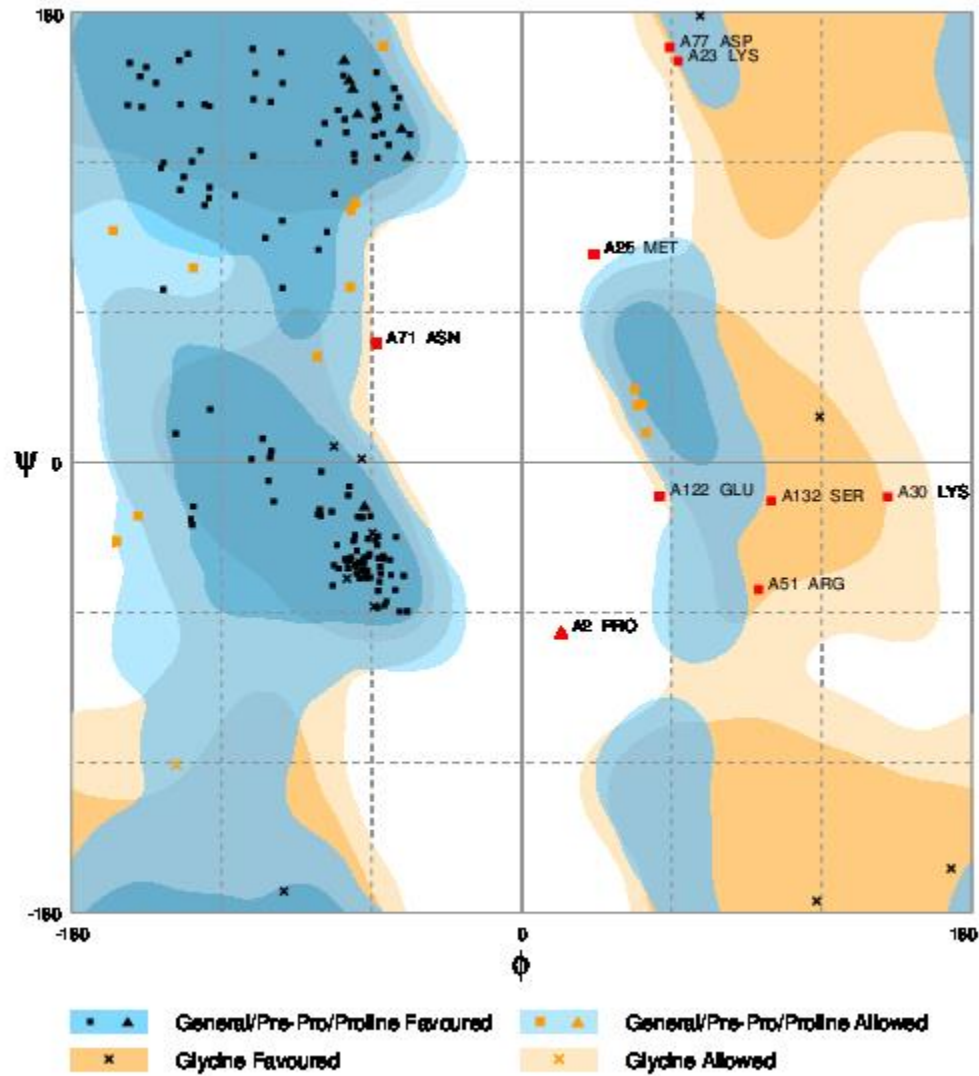

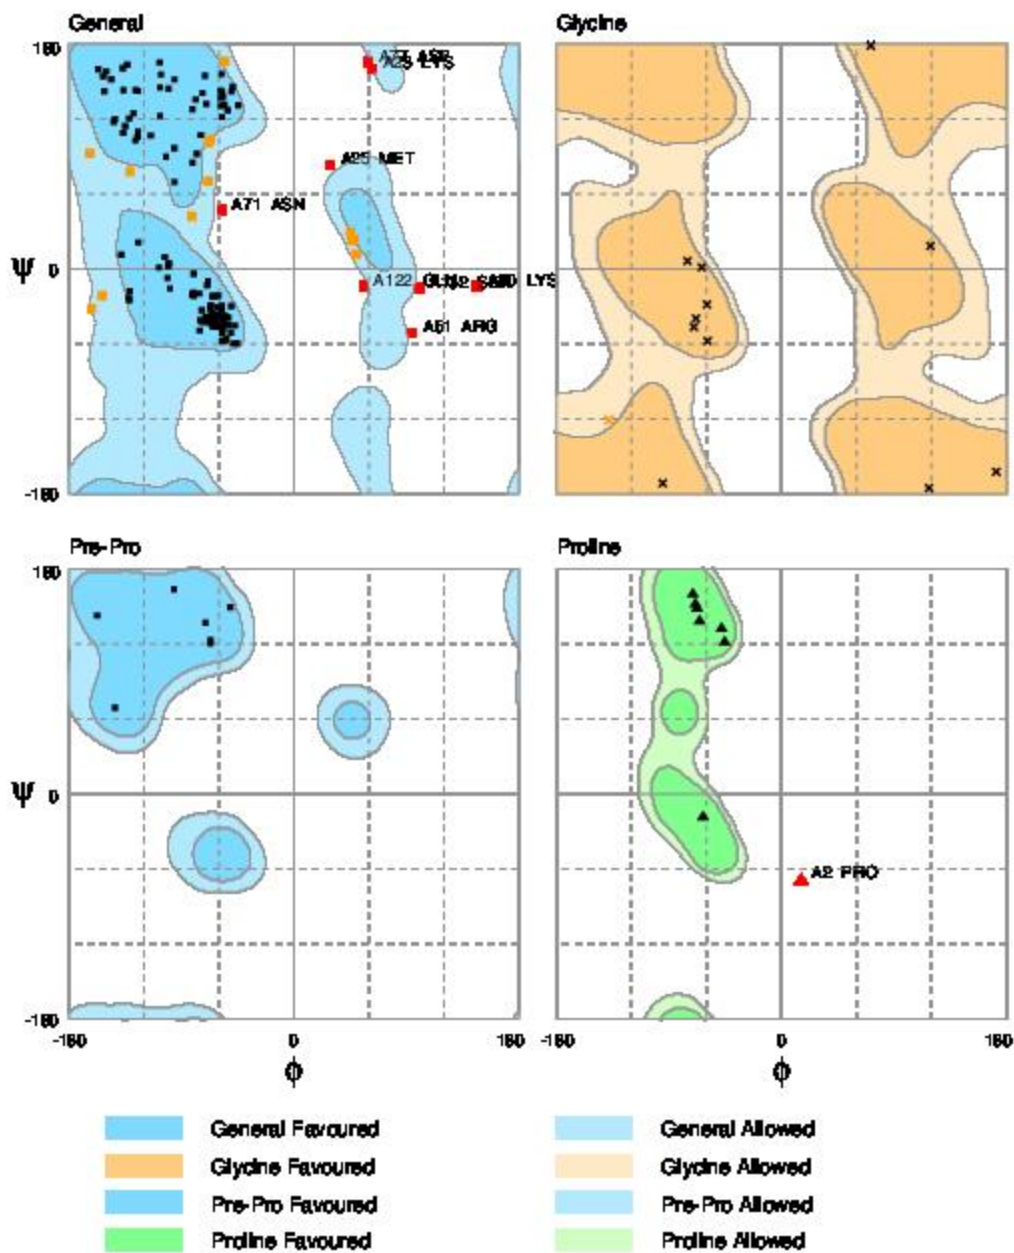

## Evaluation of residues

```

Residue [A  3 :LEU] ( 49.76, 11.91) in Allowed region
Residue [A  5 :ASP] ( 46.20, 22.92) in Allowed region
Residue [A 14 :MET] ( -66.75, 103.68) in Allowed region
Residue [A 24 :THR] (-161.94, -31.53) in Allowed region
Residue [A 31 :ASP] ( -55.34, 166.25) in Allowed region
Residue [A 44 :ASN] ( 48.39, 23.36) in Allowed region
Residue [A 70 :GLY] (-138.01, -120.82) in Allowed region
Residue [A 78 :ILE] (-153.41, -21.39) in Allowed region
Residue [A 84 :ARG] ( 45.19, 29.30) in Allowed region
Residue [A 114 :VAL] ( -68.20, 100.72) in Allowed region
Residue [A 123 :LEU] ( -68.53, 70.12) in Allowed region
Residue [A 133 :MET] ( -81.70, 42.29) in Allowed region
Residue [A 135 :SER] (-163.31, 92.56) in Allowed region
Residue [A 154 :ASN] (-131.18, 77.83) in Allowed region
Residue [A  2 :PRO] ( 15.90, -67.89) in Outlier region
Residue [A 23 :LYS] ( 62.60, 160.43) in Outlier region
Residue [A 25 :MET] ( 29.06, 83.27) in Outlier region
Residue [A 30 :LYS] ( 146.48, -13.83) in Outlier region
Residue [A 51 :ARG] ( 94.80, -50.78) in Outlier region
Residue [A 71 :ASN] ( -58.04, 47.49) in Outlier region
Residue [A 77 :ASP] ( 59.30, 165.86) in Outlier region
Residue [A 122 :GLU] ( 55.55, -13.48) in Outlier region
Residue [A 132 :SER] ( 99.90, -15.44) in Outlier region
Number of residues in favoured region    (~98.0% expected) : 144 ( 86.2%)
Number of residues in allowed region     ( ~2.0% expected)  :  14 (  8.4%)
Number of residues in outlier region      :    9 (  5.4%)

```
