# Supplementary material for: In-Silico Prediction and Modeling of the Quorum Sensing LuxS Protein and Inhibition of AI-2 Biosynthesis in Aeromonas hydrophila
Source: MDPI journal article supplement (doi:10.3390/molecules23102627), 2018-10-12
Supplement: s1 [file s1]

# Main-chain parameters

## 2958850

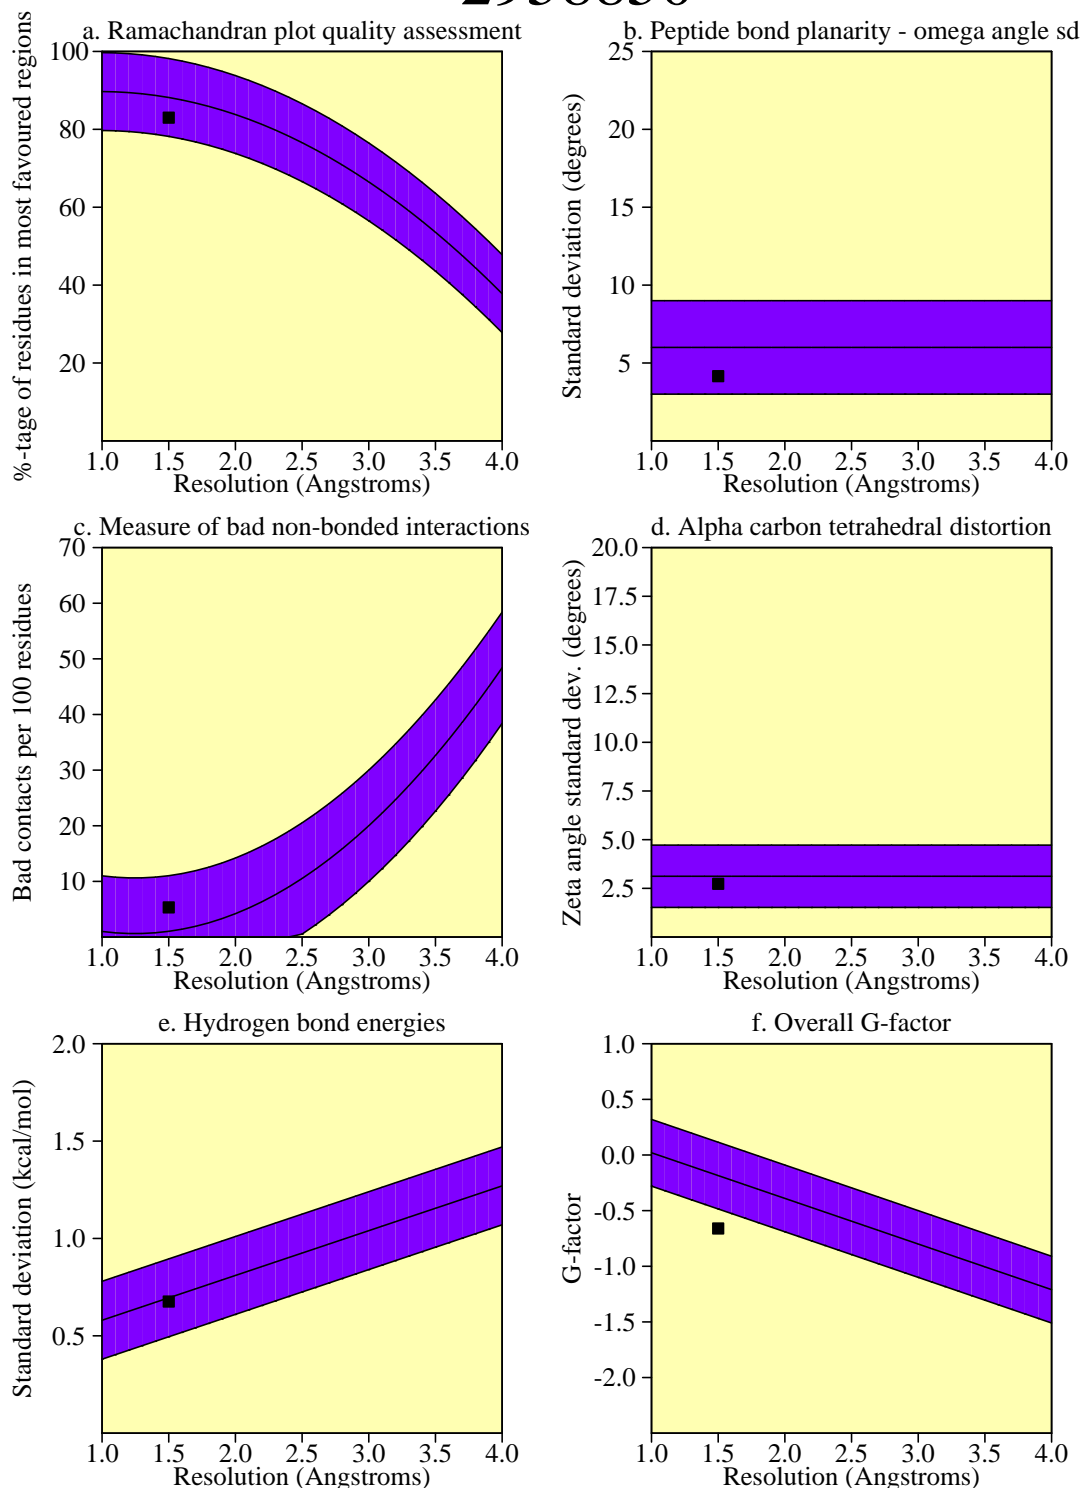

Plot statistics

| Stereochemical parameter       | No. of data pts | Parameter value | Comparison values |            | No. of band widths from mean |        |
|--------------------------------|-----------------|-----------------|-------------------|------------|------------------------------|--------|
|                                |                 |                 | Typical value     | Band width |                              |        |
| a. %-tage residues in A, B, L  | 147             | 83.0            | 88.2              | 10.0       | -0.5                         | Inside |
| b. Omega angle st dev          | 167             | 4.2             | 6.0               | 3.0        | -0.6                         | Inside |
| c. Bad contacts / 100 residues | 9               | 5.3             | 1.0               | 10.0       | 0.4                          | Inside |
| d. Zeta angle st dev           | 157             | 2.7             | 3.1               | 1.6        | -0.2                         | Inside |
| e. H-bond energy st dev        | 105             | 0.7             | 0.7               | 0.2        | -0.1                         | Inside |
| f. Overall G-factor            | 169             | -0.7            | -0.2              | 0.3        | -1.6                         | WORSE  |
