# Supplementary material for: In-Silico Prediction and Modeling of the Quorum Sensing LuxS Protein and Inhibition of AI-2 Biosynthesis in Aeromonas hydrophila
Source: MDPI journal article supplement (doi:10.3390/molecules23102627), 2018-10-12
Supplement: s1 [file s1]

Program: ERRAT2  
File: /var/www/SAVES/Jobs/95971216//errat.pdb  
Chain#:1  
Overall quality factor\*\*: 91.925

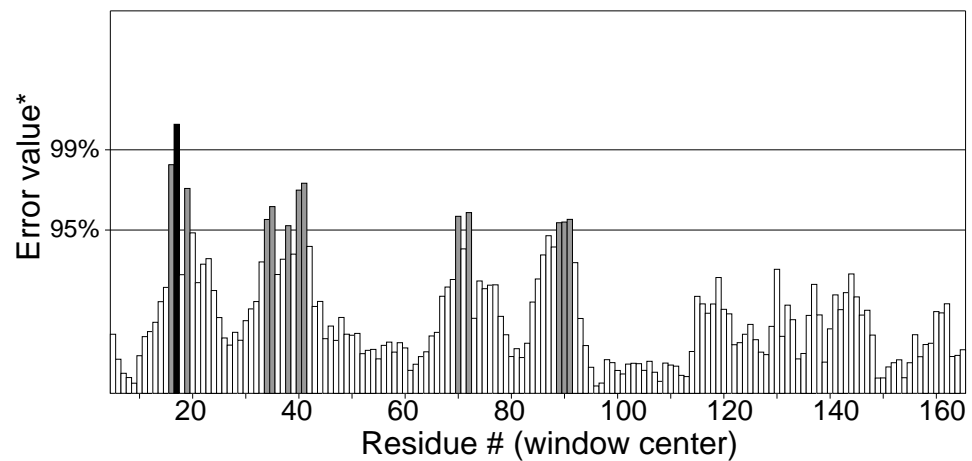

\*On the error axis, two lines are drawn to indicate the confidence with which it is possible to reject regions that exceed that error value.

\*\*Expressed as the percentage of the protein for which the calculated error value falls below the 95% rejection limit. Good high resolution structures generally produce values around 95% or higher. For lower resolutions (2.5 to 3Å) the average overall quality factor is around 91%.
