# Supplementary material for: In-Silico Prediction and Modeling of the Quorum Sensing LuxS Protein and Inhibition of AI-2 Biosynthesis in Aeromonas hydrophila
Source: MDPI journal article supplement (doi:10.3390/molecules23102627), 2018-10-12
Supplement: s1 [file s1]

# Ramachandran Plot

## 2958850

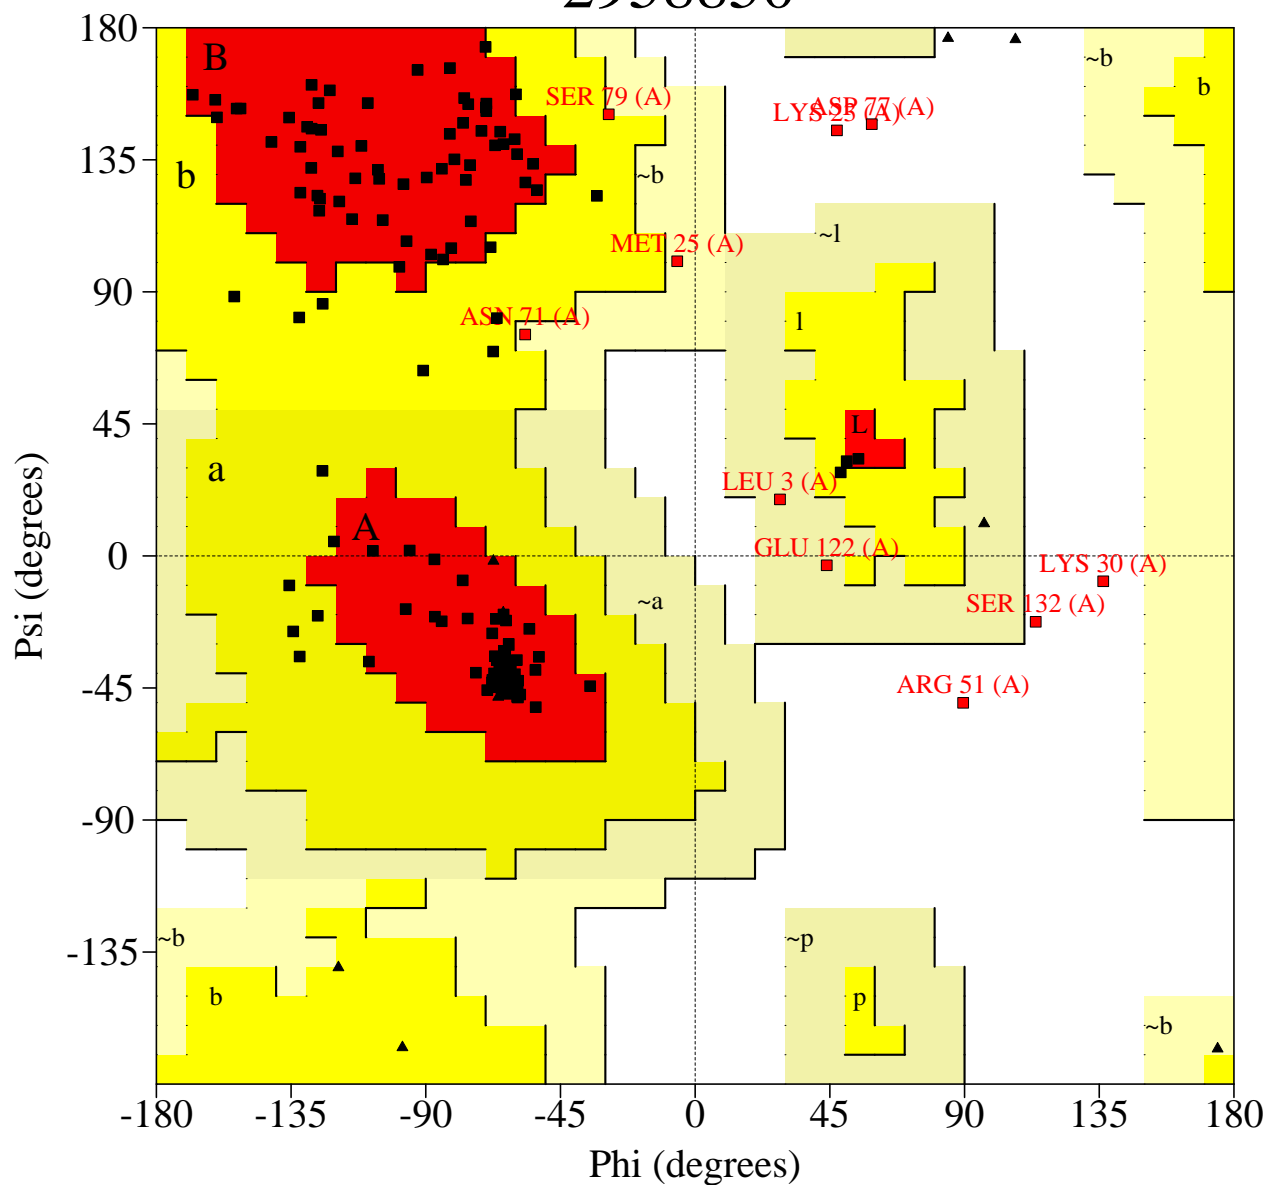

### Plot statistics

|                                                      |     |        |
|------------------------------------------------------|-----|--------|
| Residues in most favoured regions [A,B,L]            | 122 | 83.0%  |
| Residues in additional allowed regions [a,b,l,p]     | 15  | 10.2%  |
| Residues in generously allowed regions [~a,~b,~l,~p] | 5   | 3.4%   |
| Residues in disallowed regions                       | 5   | 3.4%   |
| -----                                                |     |        |
| Number of non-glycine and non-proline residues       | 147 | 100.0% |
| Number of end-residues (excl. Gly and Pro)           | 2   |        |
| Number of glycine residues (shown as triangles)      | 12  |        |
| Number of proline residues                           | 8   |        |
| -----                                                |     |        |
| Total number of residues                             | 169 |        |

Based on an analysis of 118 structures of resolution of at least 2.0 Angstroms and R-factor no greater than 20%, a good quality model would be expected to have over 90% in the most favoured regions.
