# Supplementary material for: In-Silico Prediction and Modeling of the Quorum Sensing LuxS Protein and Inhibition of AI-2 Biosynthesis in Aeromonas hydrophila
Source: MDPI journal article supplement (doi:10.3390/molecules23102627), 2018-10-12
Supplement: s1 [file s1]

# Side-chain parameters

## 2958850

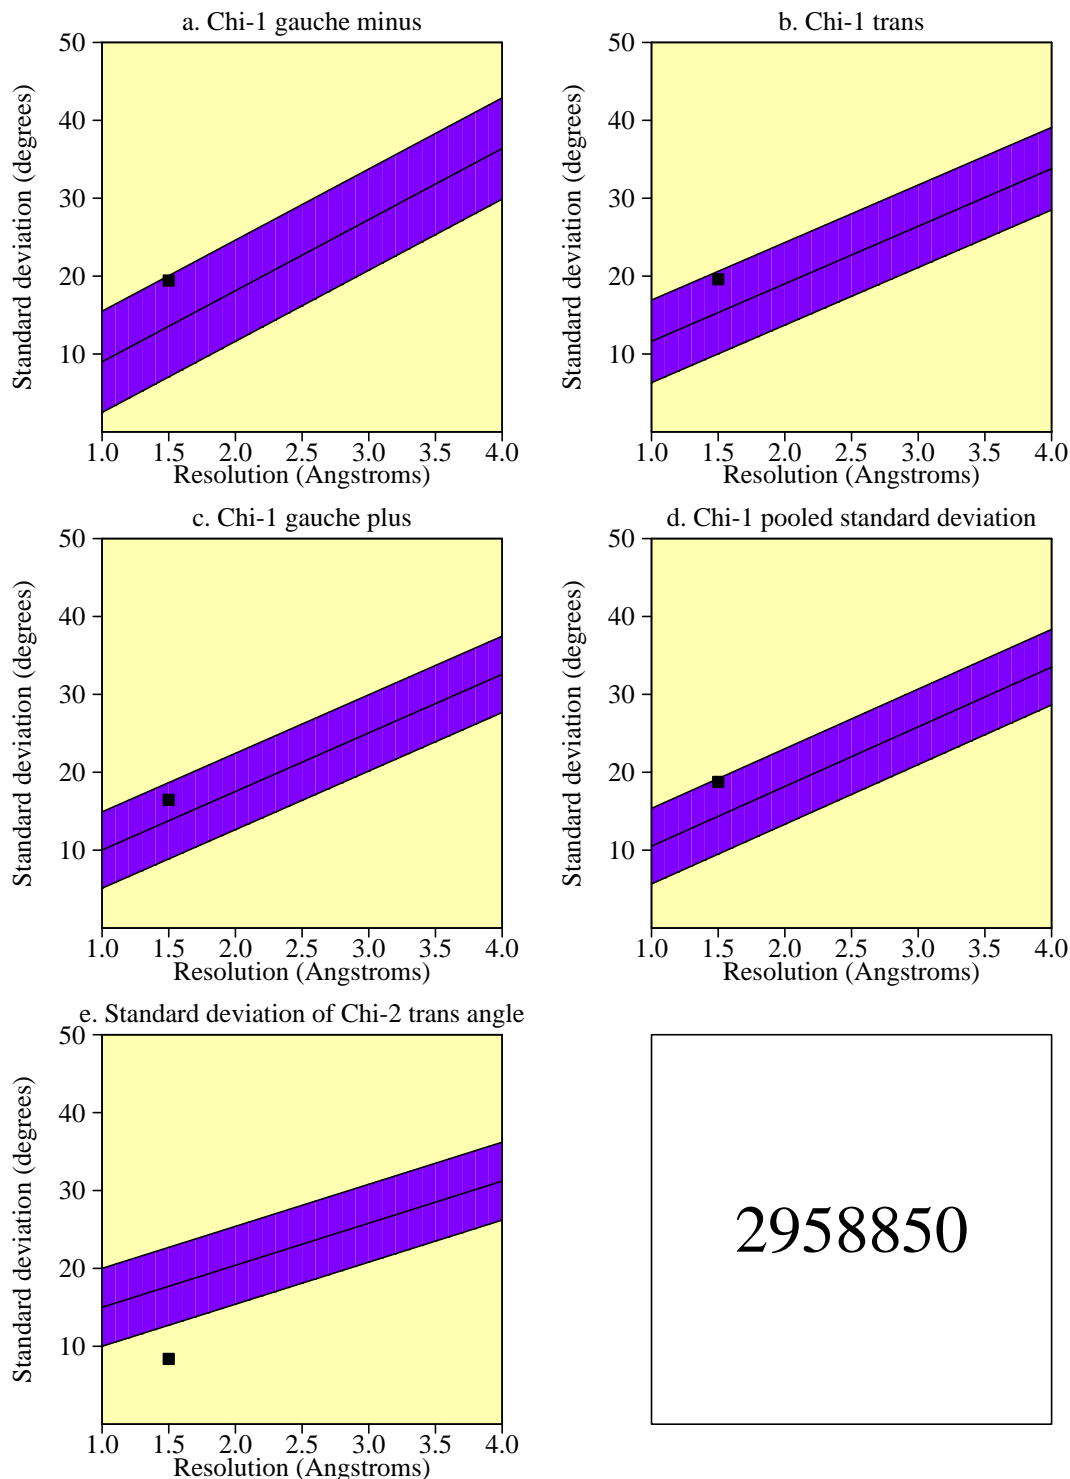

2958850

### Plot statistics

| Stereochemical parameter     | No. of data pts | Parameter value | Comparison values<br>Typical value | Band width | No. of band widths from mean |        |
|------------------------------|-----------------|-----------------|------------------------------------|------------|------------------------------|--------|
| a. Chi-1 gauche minus st dev | 26              | 19.4            | 13.6                               | 6.5        | 0.9                          | Inside |
| b. Chi-1 trans st dev        | 48              | 19.6            | 15.3                               | 5.3        | 0.8                          | Inside |
| c. Chi-1 gauche plus st dev  | 60              | 16.5            | 13.8                               | 4.9        | 0.5                          | Inside |
| d. Chi-1 pooled st dev       | 134             | 18.8            | 14.3                               | 4.8        | 0.9                          | Inside |
| e. Chi-2 trans st dev        | 42              | 8.4             | 17.7                               | 5.0        | -1.9                         | BETTER |
