# Supplementary material for: In-Silico Prediction and Modeling of the Quorum Sensing LuxS Protein and Inhibition of AI-2 Biosynthesis in Aeromonas hydrophila
Source: MDPI journal article supplement (doi:10.3390/molecules23102627), 2018-10-12
Supplement: s1 [file s1]

# PROVE

## model1.pdb

### Analysis of entire structure

Average Z-score

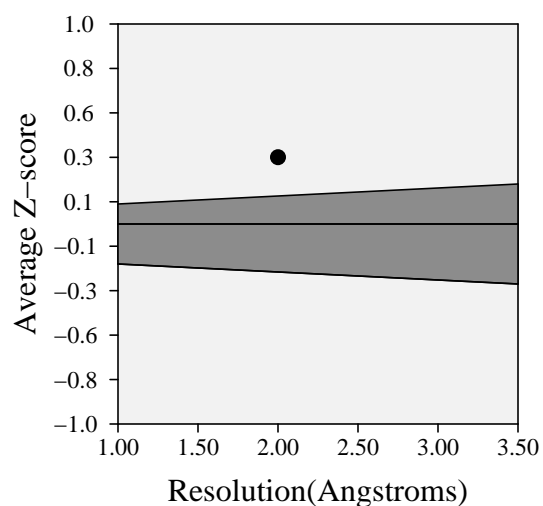

Z-score RMS

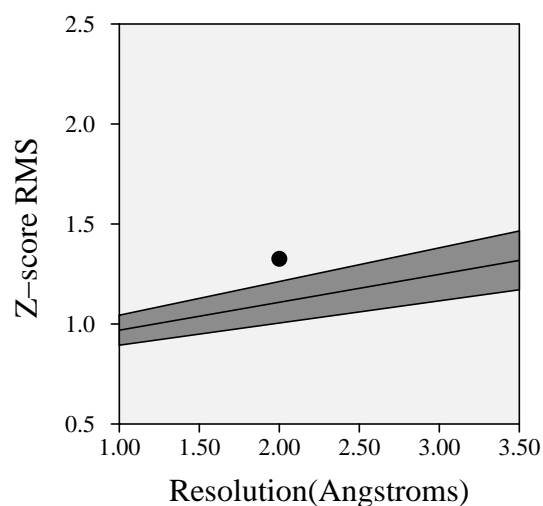

Distribution of atomic Z-scores

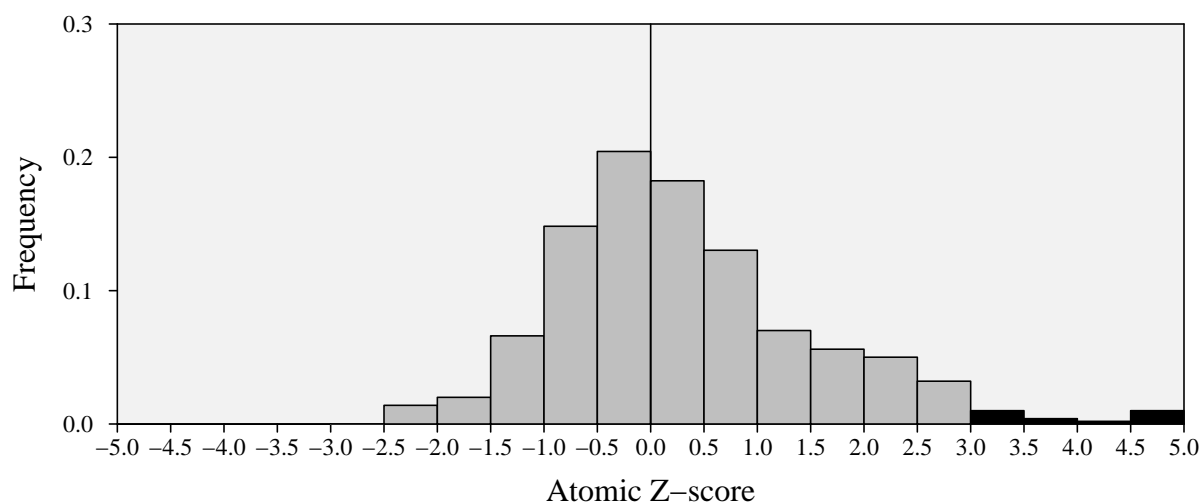

|                |       |
|----------------|-------|
| Z-score mean   | 0.334 |
| Z-score stddev | 1.284 |
| Z-score RMS    | 1.326 |
| # scored atoms | 552   |
| # outliers     | 13    |
| % outliers     | 2.400 |

# PROVE

## model1.pdb

### Analysis of residues

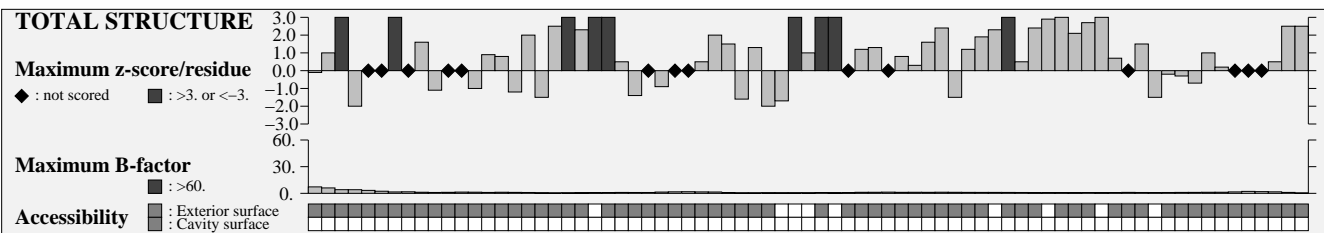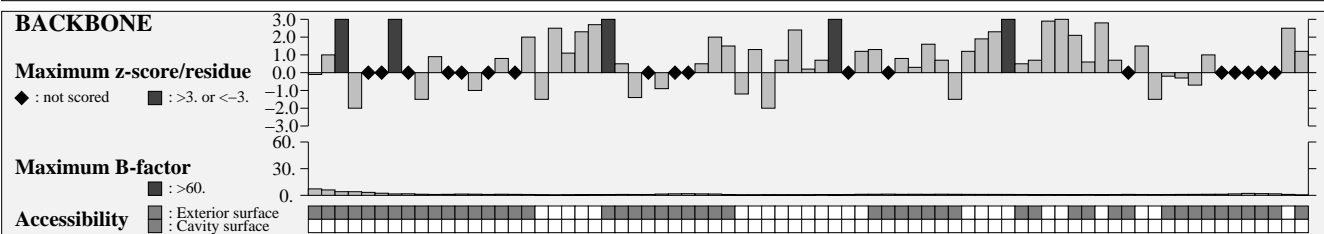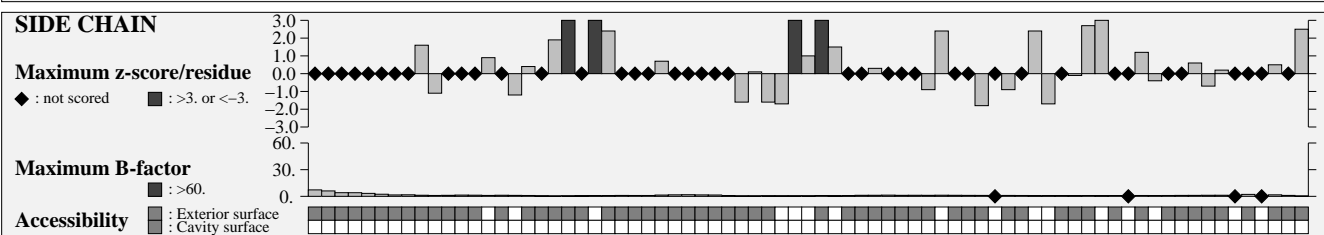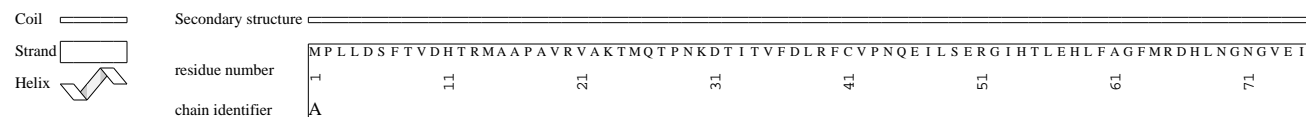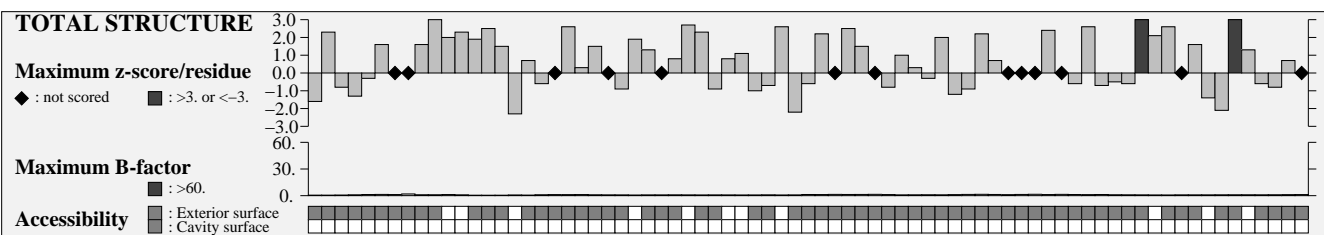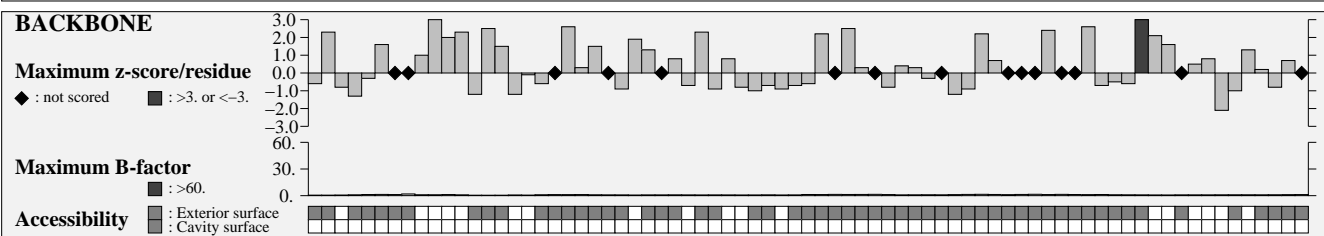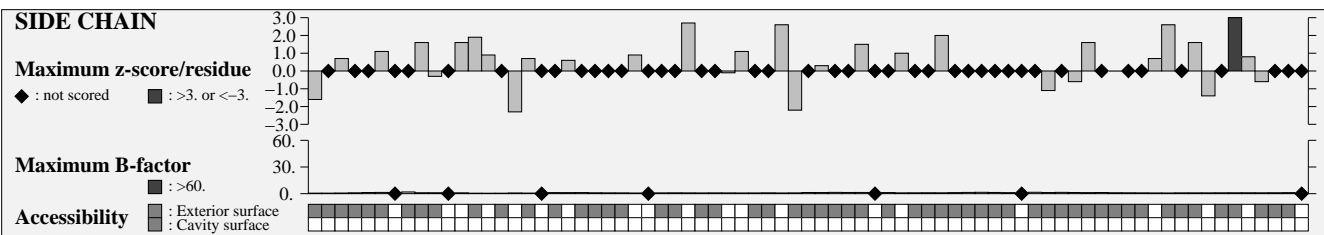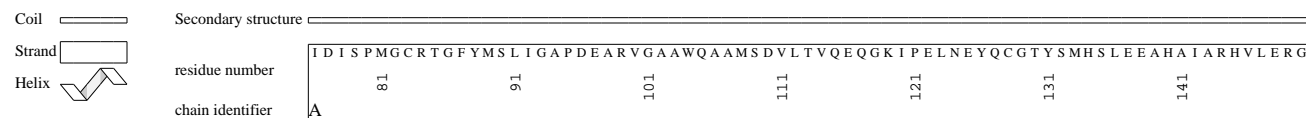

# PROVE

## model1.pdb

### Analysis of residues (2)

#### TOTAL STRUCTURE

##### Maximum z-score/residue

◆ : not scored    ■ : >3, or <-3.

##### Maximum B-factor

■ : >60.

##### Accessibility

■ : Exterior surface

■ : Cavity surface

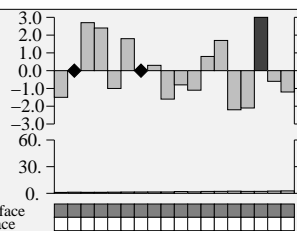

#### BACKBONE

##### Maximum z-score/residue

◆ : not scored    ■ : >3, or <-3.

##### Maximum B-factor

■ : >60.

##### Accessibility

■ : Exterior surface

■ : Cavity surface

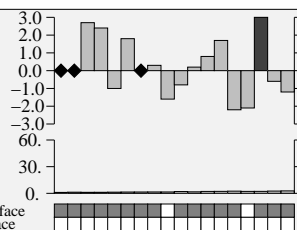

#### SIDE CHAIN

##### Maximum z-score/residue

◆ : not scored    ■ : >3, or <-3.

##### Maximum B-factor

■ : >60.

##### Accessibility

■ : Exterior surface

■ : Cavity surface

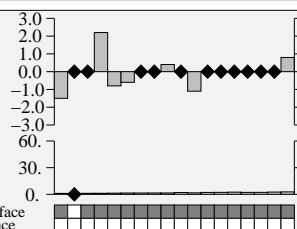

Coil 

Secondary structure 

Strand 

Helix 

residue number

chain identifier

I G V N R N D E L A L P E E K L K S  
151 161  
A
