# Supplementary material for: In-Silico Prediction and Modeling of the Quorum Sensing LuxS Protein and Inhibition of AI-2 Biosynthesis in Aeromonas hydrophila
Source: MDPI journal article supplement (doi:10.3390/molecules23102627), 2018-10-12
Supplement: s1 [file s1]

# Distorted geometry

## 2958850

### Main-chain bond lengths

|                                                    |                                                    |                                                    |                                                    |                                                    |                                                    |
|----------------------------------------------------|----------------------------------------------------|----------------------------------------------------|----------------------------------------------------|----------------------------------------------------|----------------------------------------------------|
| C 1.231 O<br>0.185<br>1.046<br>A Met 1             | CA 1.530 CB<br>0.077<br>1.453<br>A Met 1           | N 1.458 CA<br>0.059<br>1.399<br>A Met 1            | C 1.231 O<br>0.073<br>1.158<br>A Pro 2             | N 1.458 CA<br>0.119<br>1.577<br>A Leu 3            | C 1.329 N<br>0.057<br>1.272<br>A Leu 3 - A Leu 4   |
| C 1.231 O<br>0.102<br>1.129<br>A Leu 4             | CA 1.530 CB<br>0.120<br>1.650<br>A Asp 5           | N 1.458 CA<br>0.149<br>1.607<br>A Asp 5            | CA 1.525 C<br>0.080<br>1.445<br>A Ser 6            | CA 1.530 CB<br>0.082<br>1.448<br>A Ser 6           | C 1.329 N<br>0.063<br>1.266<br>A Ser 6 - A Phe 7   |
| C 1.231 O<br>0.066<br>1.297<br>A Val 9             | N 1.458 CA<br>0.059<br>1.399<br>A Val 9            | N 1.458 CA<br>0.053<br>1.405<br>A Asp 10           | C 1.231 O<br>0.061<br>1.170<br>A His 11            | CA 1.525 C<br>0.055<br>1.580<br>A Met 14           | CA 1.530 CB<br>0.066<br>1.464<br>A Met 14          |
| CA 1.525 C<br>0.066<br>1.591<br>A Ala 15           | CA 1.525 C<br>0.069<br>1.594<br>A Ala 16           | C 1.341 N<br>0.126<br>1.467<br>A Ala 16 - A Pro 17 | C 1.231 O<br>0.065<br>1.296<br>A Ala 18            | CA 1.525 C<br>0.052<br>1.577<br>A Ala 18           | C 1.329 N<br>0.074<br>1.403<br>A Ala 18 - A Val 19 |
| CA 1.525 C<br>0.079<br>1.446<br>A Val 21           | C 1.329 N<br>0.065<br>1.264<br>A Val 21 - A Ala 22 | CA 1.521 CB<br>0.063<br>1.584<br>A Ala 22          | N 1.458 CA<br>0.069<br>1.389<br>A Ala 22           | C 1.329 N<br>0.119<br>1.210<br>A Ala 22 - A Lys 23 | CA 1.525 C<br>0.181<br>1.706<br>A Lys 23           |
| CA 1.530 CB<br>0.051<br>1.581<br>A Lys 23          | C 1.329 N<br>0.061<br>1.268<br>A Thr 24 - A Met 25 | CA 1.525 C<br>0.080<br>1.605<br>A Met 25           | C 1.341 N<br>0.057<br>1.398<br>A Thr 27 - A Pro 28 | C 1.329 N<br>0.057<br>1.386<br>A Pro 28 - A Asn 29 | CA 1.525 C<br>0.064<br>1.461<br>A Asn 29           |
| N 1.458 CA<br>0.057<br>1.515<br>A Asp 31           | C 1.329 N<br>0.053<br>1.382<br>A Asp 31 - A Thr 32 | C 1.231 O<br>0.069<br>1.300<br>A Thr 32            | C 1.329 N<br>0.051<br>1.380<br>A Thr 32 - A Ile 33 | CA 1.540 CB<br>0.054<br>1.594<br>A Thr 34          | C 1.329 N<br>0.117<br>1.446<br>A Thr 34 - A Val 35 |
| C 1.329 N<br>0.092<br>1.237<br>A Val 35 - A Phe 36 | C 1.231 O<br>0.094<br>1.324<br>A Phe 36            | N 1.458 CA<br>0.059<br>1.399<br>A Phe 36           | N 1.458 CA<br>0.085<br>1.373<br>A Asp 37           | C 1.231 O<br>0.051<br>1.282<br>A Leu 38            | CA 1.530 CB<br>0.055<br>1.585<br>A Leu 38          |
| N 1.458 CA<br>0.058<br>1.400<br>A Leu 38           | CA 1.525 C<br>0.056<br>1.469<br>A Arg 39           | CA 1.525 C<br>0.050<br>1.575<br>A Phe 40           | N 1.458 CA<br>0.071<br>1.529<br>A Phe 40           | C 1.231 O<br>0.051<br>1.282<br>A Cys 41            | C 1.329 N<br>0.065<br>1.394<br>A Cys 41 - A Val 42 |
| C 1.231 O<br>0.053<br>1.284<br>A Val 42            | CA 1.525 C<br>0.073<br>1.452<br>A Pro 43           | N 1.466 CA<br>0.054<br>1.412<br>A Pro 43           | N 1.458 CA<br>0.053<br>1.405<br>A Ser 49           | C 1.329 N<br>0.064<br>1.265<br>A Ser 49 - A Glu 50 | C 1.231 O<br>0.073<br>1.304<br>A Glu 50            |
| CA 1.530 CB<br>0.062<br>1.592<br>A Glu 50          | C 1.231 O<br>0.087<br>1.318<br>A Arg 51            | C 1.329 N<br>0.061<br>1.390<br>A Arg 51 - A Gly 52 | CA 1.516 C<br>0.052<br>1.464<br>A Gly 52           | CA 1.540 CB<br>0.065<br>1.605<br>A Ile 53          | CA 1.530 CB<br>0.072<br>1.602<br>A His 54          |

# Distorted geometry

## 2958850

### Main-chain bond lengths (contd)

|                                                    |                                                     |                                                      |                                                      |                                                    |                                                    |
|----------------------------------------------------|-----------------------------------------------------|------------------------------------------------------|------------------------------------------------------|----------------------------------------------------|----------------------------------------------------|
| CA 1.540 CB<br>0.063<br>1.477<br>A Thr 55          | C 1.329 N<br>0.077<br>1.252<br>A Thr 55 - A Leu 56  | C 1.231 O<br>0.083<br>1.148<br>A Leu 56              | CA 1.525 C<br>0.050<br>1.475<br>A Leu 56             | N 1.458 CA<br>0.054<br>1.404<br>A Leu 56           | CA 1.525 C<br>0.086<br>1.439<br>A Glu 57           |
| CA 1.530 CB<br>0.066<br>1.596<br>A Glu 57          | C 1.329 N<br>0.071<br>1.400<br>A Glu 57 - A His 58  | CA 1.525 C<br>0.060<br>1.465<br>A His 58             | CA 1.530 CB<br>0.066<br>1.596<br>A His 58            | C 1.329 N<br>0.071<br>1.258<br>A His 58 - A Leu 59 | CA 1.525 C<br>0.053<br>1.577<br>A Leu 59           |
| C 1.329 N<br>0.057<br>1.272<br>A Leu 59 - A Phe 60 | CA 1.525 C<br>0.059<br>1.465<br>A Phe 60            | N 1.458 CA<br>0.070<br>1.388<br>A Phe 60             | C 1.329 N<br>0.057<br>1.272<br>A Phe 63 - A Met 64   | N 1.458 CA<br>0.090<br>1.368<br>A Met 64           | CA 1.525 C<br>0.079<br>1.604<br>A Leu 68           |
| CA 1.525 C<br>0.064<br>1.589<br>A Asn 69           | N 1.458 CA<br>0.052<br>1.510<br>A Asn 69            | CA 1.525 C<br>0.088<br>1.437<br>A Glu 74             | CA 1.525 C<br>0.064<br>1.461<br>A Ile 75             | CA 1.540 CB<br>0.051<br>1.591<br>A Ile 75          | C 1.329 N<br>0.075<br>1.254<br>A Ile 75 - A Ile 76 |
| CA 1.525 C<br>0.140<br>1.665<br>A Ile 76           | CA 1.540 CB<br>0.068<br>1.608<br>A Ile 76           | N 1.458 CA<br>0.051<br>1.407<br>A Ile 76             | C 1.329 N<br>0.135<br>1.194<br>A Ile 76 - A Asp 77   | CA 1.525 C<br>0.091<br>1.616<br>A Asp 77           | C 1.329 N<br>0.095<br>1.234<br>A Asp 77 - A Ile 78 |
| C 1.231 O<br>0.053<br>1.283<br>A Ile 78            | CA 1.525 C<br>0.069<br>1.594<br>A Ile 78            | C 1.329 N<br>0.076<br>1.405<br>A Ile 78 - A Ser 79   | N 1.458 CA<br>0.055<br>1.513<br>A Ser 79             | CA 1.525 C<br>0.146<br>1.379<br>A Pro 80           | C 1.329 N<br>0.052<br>1.277<br>A Pro 80 - A Met 81 |
| N 1.451 CA<br>0.064<br>1.515<br>A Gly 82           | C 1.329 N<br>0.056<br>1.385<br>A Cys 83 - A Arg 84  | CA 1.525 C<br>0.080<br>1.605<br>A Arg 84             | C 1.231 O<br>0.060<br>1.291<br>A Thr 85              | C 1.329 N<br>0.050<br>1.379<br>A Thr 85 - A Gly 86 | C 1.231 O<br>0.059<br>1.290<br>A Phe 87            |
| N 1.458 CA<br>0.079<br>1.536<br>A Phe 87           | CA 1.525 C<br>0.081<br>1.444<br>A Tyr 88            | CA 1.530 CB<br>0.063<br>1.593<br>A Tyr 88            | C 1.329 N<br>0.059<br>1.270<br>A Tyr 88 - A Met 89   | C 1.231 O<br>0.088<br>1.143<br>A Met 89            | CA 1.525 C<br>0.081<br>1.444<br>A Met 89           |
| C 1.329 N<br>0.102<br>1.431<br>A Met 89 - A Ser 90 | N 1.458 CA<br>0.088<br>1.370<br>A Ser 90            | C 1.329 N<br>0.075<br>1.254<br>A Ser 90 - A Leu 91   | CA 1.525 C<br>0.067<br>1.458<br>A Leu 91             | N 1.458 CA<br>0.062<br>1.395<br>A Ile 92           | C 1.329 N<br>0.067<br>1.396<br>A Ile 92 - A Gly 93 |
| C 1.231 O<br>0.082<br>1.149<br>A Gly 93            | N 1.458 CA<br>0.055<br>1.403<br>A Ala 94            | C 1.341 N<br>0.051<br>1.290<br>A Ala 94 - A Pro 95   | CA 1.525 C<br>0.053<br>1.472<br>A Pro 95             | N 1.466 CA<br>0.063<br>1.403<br>A Pro 95           | CA 1.525 C<br>0.057<br>1.582<br>A Asp 96           |
| CA 1.530 CB<br>0.050<br>1.480<br>A Asp 96          | C 1.329 N<br>0.050<br>1.279<br>A Arg 99 - A Val 100 | C 1.329 N<br>0.050<br>1.279<br>A Ala 103 - A Trp 104 | C 1.329 N<br>0.077<br>1.406<br>A Trp 104 - A Gln 105 | CA 1.525 C<br>0.057<br>1.468<br>A Gln 105          | CA 1.540 CB<br>0.065<br>1.605<br>A Val 114         |

# Distorted geometry

## 2958850

### Main-chain bond lengths (contd)

|                                                      |                                                      |                                                      |                                           |                                                      |                                                      |
|------------------------------------------------------|------------------------------------------------------|------------------------------------------------------|-------------------------------------------|------------------------------------------------------|------------------------------------------------------|
| N 1.458 CA<br>0.059<br>1.517<br>A Val 114            | CA 1.525 C<br>0.061<br>1.586<br>A Gln 115            | C 1.231 O<br>0.051<br>1.282<br>A Glu 116             | N 1.458 CA<br>0.086<br>1.544<br>A Glu 116 | CA 1.525 C<br>0.075<br>1.450<br>A Ile 120            | CA 1.540 CB<br>0.051<br>1.591<br>A Ile 120           |
| N 1.458 CA<br>0.067<br>1.391<br>A Ile 120            | C 1.231 O<br>0.054<br>1.176<br>A Pro 121             | CA 1.525 C<br>0.066<br>1.591<br>A Glu 122            | N 1.458 CA<br>0.066<br>1.523<br>A Glu 122 | N 1.458 CA<br>0.065<br>1.523<br>A Glu 125            | C 1.329 N<br>0.058<br>1.271<br>A Glu 125 - A Tyr 126 |
| CA 1.525 C<br>0.091<br>1.616<br>A Cys 128            | N 1.451 CA<br>0.064<br>1.515<br>A Gly 129            | CA 1.525 C<br>0.083<br>1.608<br>A Thr 130            | N 1.458 CA<br>0.091<br>1.367<br>A Met 133 | CA 1.525 C<br>0.055<br>1.470<br>A Ser 135            | CA 1.530 CB<br>0.108<br>1.422<br>A Ser 135           |
| CA 1.525 C<br>0.061<br>1.464<br>A Ala 141            | CA 1.525 C<br>0.082<br>1.442<br>A Arg 144            | CA 1.530 CB<br>0.094<br>1.624<br>A His 145           | CA 1.525 C<br>0.058<br>1.467<br>A Val 146 | CA 1.540 CB<br>0.080<br>1.460<br>A Val 146           | N 1.458 CA<br>0.055<br>1.403<br>A Leu 147            |
| C 1.329 N<br>0.055<br>1.274<br>A Leu 147 - A Glu 148 | N 1.451 CA<br>0.083<br>1.368<br>A Gly 150            | C 1.329 N<br>0.052<br>1.277<br>A Val 153 - A Asn 154 | C 1.231 O<br>0.059<br>1.172<br>A Asn 156  | C 1.341 N<br>0.051<br>1.392<br>A Leu 161 - A Pro 162 | C 1.329 N<br>0.055<br>1.274<br>A Pro 162 - A Glu 163 |
| CA 1.530 CB<br>0.061<br>1.590<br>A Glu 164           | C 1.329 N<br>0.051<br>1.278<br>A Glu 164 - A Lys 165 | CA 1.530 CB<br>0.134<br>1.396<br>A Lys 165           | N 1.458 CA<br>0.076<br>1.382<br>A Lys 165 | CA 1.530 CB<br>0.079<br>1.451<br>A Lys 167           | CA 1.525 C<br>0.056<br>1.581<br>A Ser 168            |
| CA 1.525 C<br>0.051<br>1.576<br>A Leu 169            |                                                      |                                                      |                                           |                                                      |                                                      |

Bonds differing by > 0.05Å from small-molecule values. Values shown: "ideal", difference, actual

### Main-chain bond angles

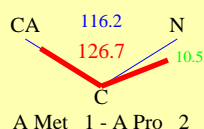

Bond angles differing by > 10.0 degrees from small-molec values. Values shown: "ideal", actual, diff.

# Distorted geometry

## 2958850

### Planar groups

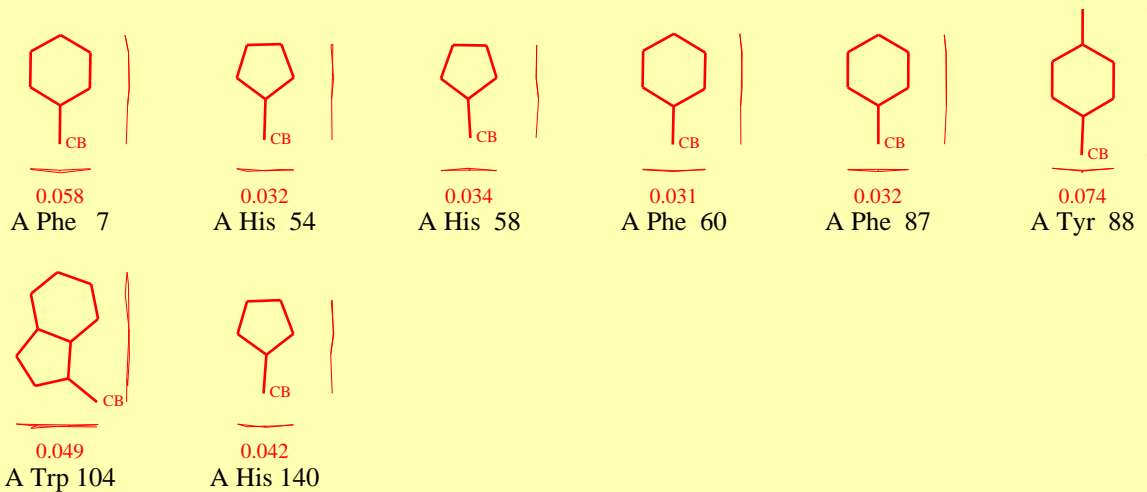

Sidechains with RMS dist. from planarity > 0.03A for rings, or > 0.02A otherwise. Value shown is RMS dist.
